# Supplementary material
Source: PubMed Central journal article supplement (PMC6458323)
Supplement: rspb20182867supp1.pdf [file rspb20182867supp1.pdf]

## Appendix A

See figures S1–S3; see tables S1 and S2.

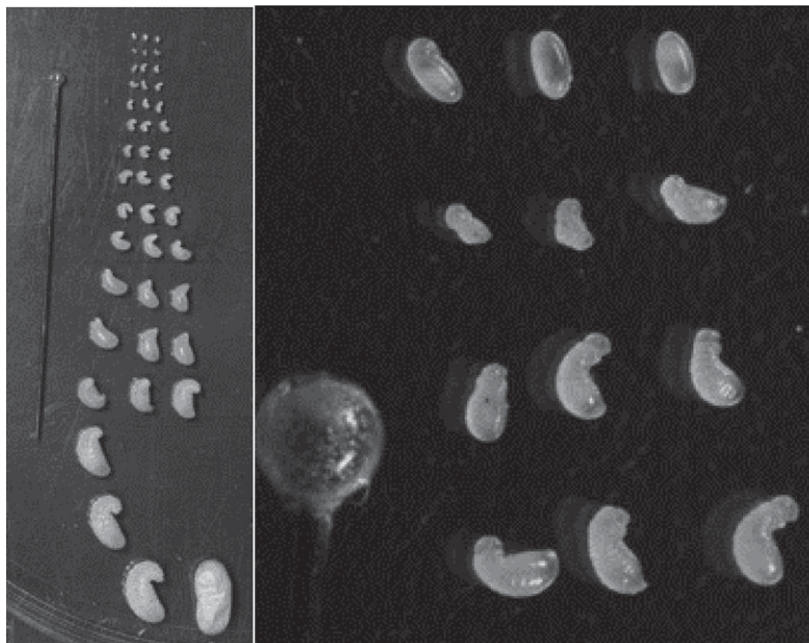

**Figure S1.** Size of *Formica fusca* larvae used in this study. (Left) Eggs in the top row, pupae in the bottom row and larvae of increasing size in between. The upper half of the range represents the larvae used in this study. (Right) Magnified view of the upper four rows. Reproduced from Morandin *et al.* [85].

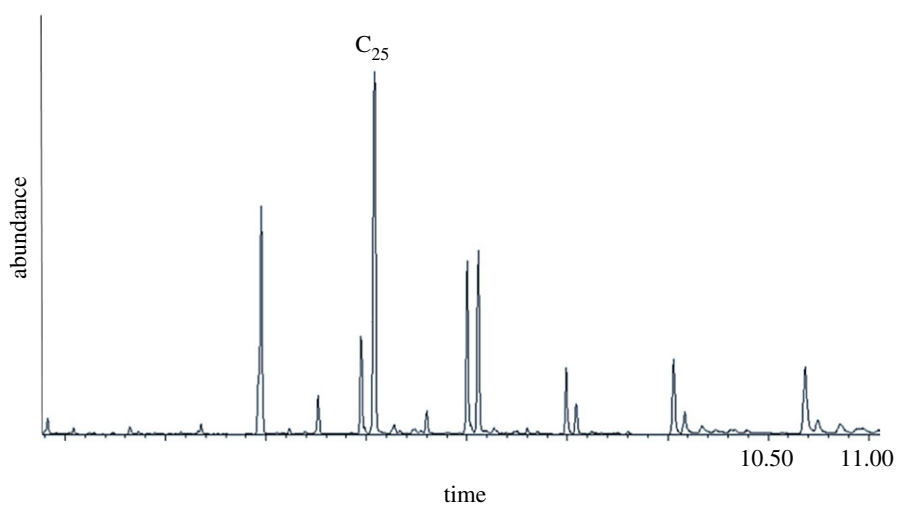

**Figure S2.** Typical chemical profile of a *Formica truncorum* egg. (Online version in colour.)

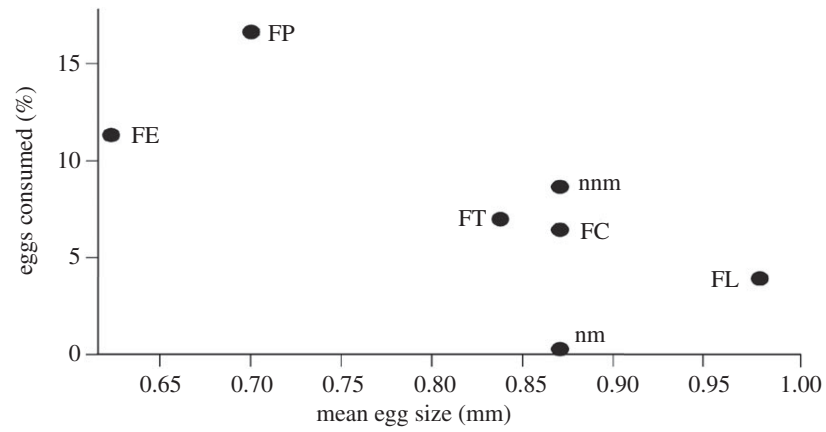

**Figure S3.** Percentage of eggs consumed plotted against mean egg size. FE, *F. exsecta*; FP, *F. pressilabris*; FT, *F. truncorum*; FC, *F. cinerea*; FL, *F. lemani*; nmm, *F. fusca* non-nest-mate; nm, *F. fusca* nest-mate.

**Table S1.** Presence–absence matrix of egg hydrocarbons across species (grey, present; white, absent).

| Peak # | Compound                                              | <i>F. fusca</i> | <i>F. cinerea</i> | <i>F. lemani</i> | <i>F. exsecta</i> | <i>F. pressilabris</i> | <i>F. truncorum</i> |
|--------|-------------------------------------------------------|-----------------|-------------------|------------------|-------------------|------------------------|---------------------|
| 1      | C <sub>21:1</sub>                                     |                 |                   |                  |                   |                        |                     |
| 2      | C <sub>21</sub>                                       |                 |                   |                  |                   |                        |                     |
| 3      | 7-MeC <sub>21</sub>                                   |                 |                   |                  |                   |                        |                     |
| 4      | C <sub>22</sub>                                       |                 |                   |                  |                   |                        |                     |
| 5      | 8,10-DiMeC <sub>22</sub>                              |                 |                   |                  |                   |                        |                     |
| 6      | 6-MeC <sub>22</sub>                                   |                 |                   |                  |                   |                        |                     |
| 7      | C <sub>23:1</sub>                                     |                 |                   |                  |                   |                        |                     |
| 8      | C <sub>23</sub>                                       |                 |                   |                  |                   |                        |                     |
| 9      | 9,11-DiMeC <sub>23</sub>                              |                 |                   |                  |                   |                        |                     |
| 10     | 7-MeC <sub>23</sub>                                   | a               |                   |                  |                   |                        |                     |
| 11     | 7,y-DiMeC <sub>23</sub>                               | a               |                   |                  |                   |                        |                     |
| 12     | 5-MeC <sub>23</sub>                                   |                 |                   |                  |                   |                        |                     |
| 13     | 3-MeC <sub>23</sub>                                   |                 |                   |                  |                   |                        |                     |
| 14     | 7,15-DiMeC <sub>23</sub>                              |                 |                   |                  |                   |                        |                     |
| 15     | C <sub>24:1</sub>                                     |                 |                   |                  |                   |                        |                     |
| 16     | C <sub>24</sub>                                       | b               |                   |                  |                   |                        |                     |
| 17     | 3,x-DiMeC <sub>23</sub>                               | b               |                   |                  |                   |                        |                     |
| 18     | 8,10,12-TriMeC <sub>24</sub>                          |                 |                   |                  |                   |                        |                     |
| 19     | 3,7-DiMeC <sub>23</sub>                               |                 |                   |                  |                   |                        |                     |
| 20     | x,y,z-TriMeC <sub>23</sub>                            |                 |                   |                  |                   |                        |                     |
| 21     | 6-MeC <sub>24</sub>                                   |                 |                   |                  |                   |                        |                     |
| 22     | 4-MeC <sub>24</sub>                                   |                 |                   |                  |                   |                        |                     |
| 23     | C <sub>25:1</sub>                                     |                 |                   |                  |                   |                        |                     |
| 24     | C <sub>25</sub>                                       |                 |                   |                  |                   |                        |                     |
| 25     | 9,11-DiMeC <sub>25</sub>                              |                 |                   |                  |                   |                        |                     |
| 26     | 7-MeC <sub>25</sub>                                   |                 |                   |                  |                   |                        |                     |
| 27     | 5-MeC <sub>25</sub>                                   |                 |                   |                  |                   |                        |                     |
| 28     | 9,11-DiMeC <sub>25</sub>                              |                 |                   |                  |                   |                        |                     |
| 29     | 3-MeC <sub>25</sub>                                   |                 |                   |                  |                   |                        |                     |
| 30     | 5,x-DiMeC <sub>25</sub>                               |                 |                   |                  |                   |                        |                     |
| 31     | C <sub>26</sub>                                       | c               | c                 |                  |                   |                        |                     |
| 32     | C <sub>25</sub> , C <sub>26</sub> Methyls & DiMethyls | c               | c                 |                  |                   |                        |                     |
| 33     | C <sub>27:1</sub>                                     |                 |                   |                  |                   |                        |                     |
| 34     | C <sub>27</sub>                                       |                 |                   |                  |                   |                        |                     |
| 35     | 9,11-DiMeC <sub>27</sub>                              |                 |                   |                  |                   |                        |                     |
| 36     | 7-MeC <sub>27</sub>                                   |                 |                   |                  |                   |                        |                     |
| 37     | 5-MeC <sub>27</sub>                                   |                 |                   |                  |                   |                        |                     |
| 38     | 11,15-DiMeC <sub>27</sub>                             |                 |                   |                  |                   |                        |                     |
| 39     | 3-MeC <sub>27</sub>                                   |                 |                   |                  |                   |                        |                     |
| 40     | x,y-DiMeC <sub>27</sub>                               |                 |                   |                  |                   |                        |                     |
| 41     | unknown                                               |                 |                   |                  |                   |                        |                     |
| 42     | x,y-DiMeC <sub>27</sub>                               |                 |                   |                  |                   |                        |                     |
| 43     | C <sub>28:1</sub>                                     |                 |                   |                  |                   |                        |                     |
| 44     | 10,12-DiMeC <sub>28</sub>                             |                 |                   |                  |                   |                        |                     |
| 45     | C <sub>29:1</sub>                                     |                 |                   |                  |                   |                        |                     |
| 46     | C <sub>29</sub>                                       |                 |                   |                  |                   |                        |                     |
| 47     | 9,11-DiMeC <sub>29</sub>                              |                 |                   |                  |                   |                        |                     |
| 48     | 7-MeC <sub>29</sub>                                   |                 |                   |                  |                   |                        |                     |
| 49     | 3-MeC <sub>29</sub>                                   |                 |                   |                  |                   |                        |                     |
| 50     | C <sub>31:1</sub>                                     |                 |                   |                  |                   |                        |                     |
| 51     | C <sub>31</sub>                                       |                 |                   |                  |                   |                        |                     |

<sup>a</sup>Peaks 10 and 11 in *F. fusca* eluted together, the peak area of this coeluted peak was divided in half to obtain the raw peak areas for peaks 10 and 11.

<sup>b</sup>Peaks 16 and 17 in *F. fusca* eluted together, the peak area of this coeluted peak was divided in half to obtain the raw peak areas for peaks 16 and 17.

<sup>c</sup>Peak 31: C<sub>26</sub> coeluted together with a 5,x-DiMeC<sub>25</sub> in *F. fusca* and with 5,y-DiMeC<sub>25</sub> in *F. cinerea*. The peak areas of these coeluted peaks were divided in half to obtain the raw peak areas for C<sub>26</sub> and the DiMeC<sub>25</sub> in both species. Peak 32 (C<sub>25</sub>, C<sub>26</sub> methyls and dimethyls) in *F. fusca* and *F. cinerea* contains several unidentified methyls and dimethyls of C<sub>25</sub> and C<sub>26</sub>, including the other halves of the peaks that coeluted with C<sub>26</sub> (peak 31). All these combined peaks were located between C<sub>26</sub> and C<sub>27:1</sub> (chemical profiles: [30]).

**Table S2.** The contributions of the compounds to the principal components.

|        |                                                         | PC-axis 1       | PC-axis 2       | PC-axis 3       | PC-axis 4       | PC-axis 5       |
|--------|---------------------------------------------------------|-----------------|-----------------|-----------------|-----------------|-----------------|
|        | variance                                                | 53.6%           | 28.5%           | 7.5%            | 6.2%            | 3.4%            |
|        | cumulative %                                            | 53.6%           | 82.1%           | 89.6%           | 95.9%           | 99.2%           |
|        | lambda                                                  | 5.23            | 3.81            | 1.96            | 1.78            | 1.31            |
| peak # | compound                                                | loading comp. 1 | loading comp. 2 | loading comp. 3 | loading comp. 4 | loading comp. 5 |
| 1      | C <sub>21:1</sub>                                       | 0.069           | 0.193           | 0.114           | 0.292           | 0.021           |
| 2      | C <sub>21</sub>                                         | 0.135           | 0.001           | 0.300           | -0.016          | 0.294           |
| 3      | 7-MeC <sub>21</sub>                                     | 0.164           | -0.134          | 0.024           | 0.008           | 0.008           |
| 4      | C <sub>22</sub>                                         | 0.145           | -0.064          | 0.113           | 0.233           | 0.271           |
| 5      | 8,10-DiMeC <sub>22</sub>                                | 0.161           | -0.140          | 0.022           | 0.012           | -0.003          |
| 6      | 6-MeC <sub>22</sub>                                     | 0.163           | -0.136          | 0.024           | 0.009           | 0.005           |
| 7      | C <sub>23:1</sub>                                       | 0.163           | 0.131           | 0.035           | -0.003          | 0.076           |
| 8      | C <sub>23</sub>                                         | 0.121           | 0.196           | 0.086           | 0.013           | -0.052          |
| 9      | 9,11-DiMeC <sub>23</sub>                                | 0.053           | 0.123           | 0.257           | -0.361          | 0.140           |
| 10     | 7-MeC <sub>23</sub>                                     | 0.001           | -0.252          | 0.022           | 0.090           | -0.165          |
| 11     | 7,y-DiMeC <sub>23</sub>                                 | -0.188          | 0.038           | 0.040           | 0.002           | 0.042           |
| 12     | 5-MeC <sub>23</sub>                                     | 0.161           | -0.140          | 0.022           | 0.012           | -0.003          |
| 13     | 3-MeC <sub>23</sub>                                     | -0.019          | -0.170          | -0.382          | -0.047          | 0.005           |
| 14     | 7,15-DiMeC <sub>23</sub>                                | 0.162           | -0.137          | 0.023           | 0.009           | 0.001           |
| 15     | C <sub>24:1</sub>                                       | 0.059           | 0.141           | -0.313          | -0.173          | 0.291           |
| 16     | C <sub>24</sub>                                         | 0.108           | 0.194           | 0.042           | 0.019           | -0.206          |
| 17     | 3,x-DiMeC <sub>23</sub>                                 | -0.190          | 0.017           | 0.033           | 0.014           | 0.008           |
| 18     | 8,10,12-TriMeC <sub>24</sub>                            | -0.190          | 0.026           | 0.036           | 0.009           | 0.021           |
| 19     | 3,7-DiMeC <sub>23</sub>                                 | 0.163           | -0.135          | 0.024           | 0.008           | 0.006           |
| 20     | x,y,z-TriMeC <sub>23</sub>                              | 0.162           | -0.137          | 0.023           | 0.010           | 0.002           |
| 21     | 6-MeC <sub>24</sub>                                     | 0.163           | -0.137          | 0.023           | 0.009           | 0.003           |
| 22     | 4-MeC <sub>24</sub>                                     | 0.164           | -0.134          | 0.024           | 0.007           | 0.007           |
| 23     | C <sub>25:1</sub>                                       | 0.101           | 0.220           | 0.015           | -0.026          | -0.034          |
| 24     | C <sub>25</sub>                                         | 0.083           | 0.231           | 0.050           | 0.004           | -0.101          |
| 25     | 9,11-DiMeC <sub>25</sub>                                | -0.052          | -0.138          | 0.301           | -0.289          | -0.138          |
| 26     | 7-MeC <sub>25</sub>                                     | -0.068          | -0.233          | 0.025           | 0.093           | -0.171          |
| 27     | 5-MeC <sub>25</sub>                                     | -0.190          | 0.016           | 0.032           | 0.015           | 0.006           |
| 28     | 9,11-DiMeC <sub>25</sub>                                | -0.189          | 0.021           | 0.035           | 0.011           | 0.015           |
| 29     | 3-MeC <sub>25</sub>                                     | -0.023          | -0.109          | -0.165          | -0.470          | 0.025           |
| 30     | 5,x-DiMeC <sub>25</sub>                                 | -0.190          | 0.015           | 0.032           | 0.015           | 0.004           |
| 31     | C <sub>26</sub>                                         | 0.019           | 0.074           | -0.132          | -0.310          | -0.551          |
| 32     | C <sub>25</sub> , C <sub>26</sub> methyls and dimethyls | -0.063          | -0.235          | 0.021           | 0.096           | -0.181          |
| 33     | C <sub>27:1</sub>                                       | 0.097           | 0.217           | -0.010          | -0.063          | -0.122          |
| 34     | C <sub>27</sub>                                         | 0.087           | 0.220           | 0.050           | -0.009          | -0.197          |
| 35     | 9,11-DiMeC <sub>27</sub>                                | -0.190          | 0.011           | 0.031           | 0.017           | -0.002          |
| 36     | 7-MeC <sub>27</sub>                                     | -0.190          | 0.016           | 0.033           | 0.014           | 0.007           |
| 37     | 5-MeC <sub>27</sub>                                     | -0.189          | 0.024           | 0.036           | 0.009           | 0.020           |
| 38     | 11,15-DiMeC <sub>27</sub>                               | -0.189          | 0.023           | 0.035           | 0.011           | 0.015           |
| 39     | 3-MeC <sub>27</sub>                                     | -0.040          | -0.143          | -0.409          | -0.060          | 0.019           |
| 40     | x,y-DiMeC <sub>27</sub>                                 | -0.047          | -0.242          | 0.027           | 0.093           | -0.169          |

(Continued.)

**Table S2.** (Continued.)

| peak # | compound                  | loading comp. 1 | loading comp. 2 | loading comp. 3 | loading comp. 4 | loading comp. 5 |
|--------|---------------------------|-----------------|-----------------|-----------------|-----------------|-----------------|
| 41     | unknown                   | -0.190          | 0.024           | 0.036           | 0.009           | 0.018           |
| 42     | x,y-DiMeC <sub>27</sub>   | -0.189          | 0.025           | 0.036           | 0.009           | 0.019           |
| 43     | C <sub>28:1</sub>         | 0.058           | 0.139           | -0.320          | -0.172          | 0.287           |
| 44     | 10,12-DiMeC <sub>28</sub> | -0.189          | 0.029           | 0.037           | 0.007           | 0.026           |
| 45     | C <sub>29:1</sub>         | 0.127           | 0.179           | -0.053          | -0.004          | -0.167          |
| 46     | C <sub>29</sub>           | 0.091           | 0.213           | 0.016           | 0.043           | -0.219          |
| 47     | 9,11-DiMeC <sub>29</sub>  | -0.190          | 0.023           | 0.035           | 0.011           | 0.017           |
| 48     | 7-MeC <sub>29</sub>       | -0.189          | 0.027           | 0.037           | 0.008           | 0.024           |
| 49     | 3-MeC <sub>29</sub>       | -0.187          | 0.026           | 0.036           | 0.009           | 0.018           |
| 50     | C <sub>31:1</sub>         | 0.043           | 0.063           | -0.293          | 0.410           | -0.115          |
| 51     | C <sub>31</sub>           | -0.067          | 0.197           | -0.197          | 0.227           | 0.000           |
